# Supplementary material for: Composition of gut and oropharynx bacterial communities in Rattus norvegicus and Suncus murinus in China
Source: PubMed Central journal article supplement (PMC7603701; doi:10.1186/s12917-020-02619-6), 2020-10-31

Figure S1

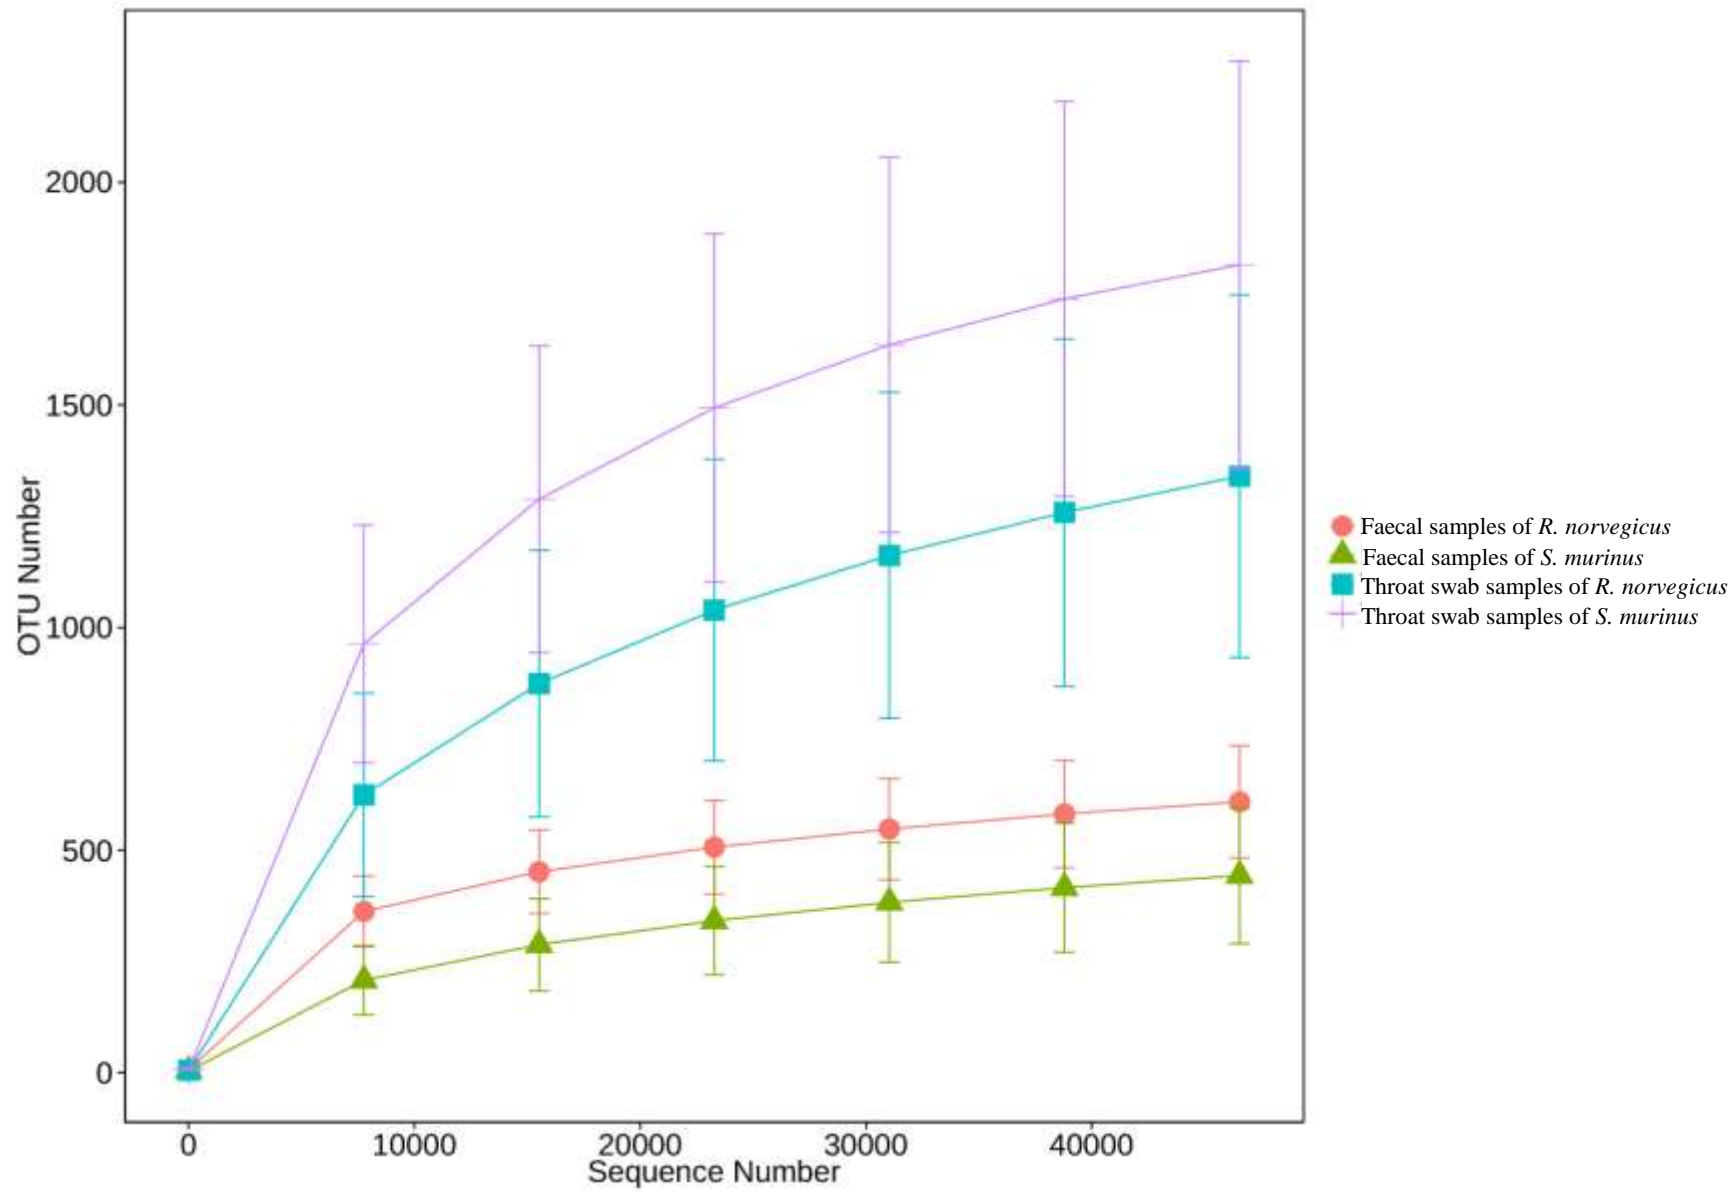

Supplement: 12917_2020_2619_MOESM1_ESM.pdf [file 12917_2020_2619_MOESM1_ESM.pdf]
